# Supplementary material for: Cytokine engineered NK-92 therapy to improve persistence and anti-tumor activity
Source: PubMed Central journal article supplement (PMC10086201; doi:10.7150/thno.79942), 2023-03-05
Supplement: thnov13p1506s1.pdf [file thnov13p1506s1.pdf]

## Supporting Information

### **Cytokine engineered NK-92 therapy to improve persistence and anti-tumor activity**

Hyun Young Shin<sup>1</sup>, Seil Jang<sup>1</sup>, Hyeong Jung Woo<sup>2</sup>, Jae-Hee Chung<sup>1</sup>, Woon-Hae Kim<sup>1</sup>, Dongoh Kim<sup>1</sup>, Minju Kang<sup>1</sup>, Yujin Lim<sup>1</sup>, Omer Habib<sup>1</sup>, Jungmin Lee<sup>1</sup>, Sohae Yang<sup>2</sup>, Dae Hee Lee<sup>1</sup>, and Minseok S. Kim<sup>1,2,3,4\*</sup>

1. CTCELLS Inc., 216, Gaepo-ro, Gangnam-gu, Seoul, 06307, Republic of Korea
2. Department of New Biology, DGIST, Daegu, 42988, Republic of Korea
3. Translational Responsive Medicine Center (TRMC), DGIST, Daegu 42988, Republic of Korea
4. New Biology Research Center (NBRC), DGIST, Daegu 42988, Republic of Korea

\* Corresponding authors: Minseok S. Kim, Department of New Biology, DGIST, Daegu 42988, Republic of Korea. E-mail: kms@dgist.ac.kr

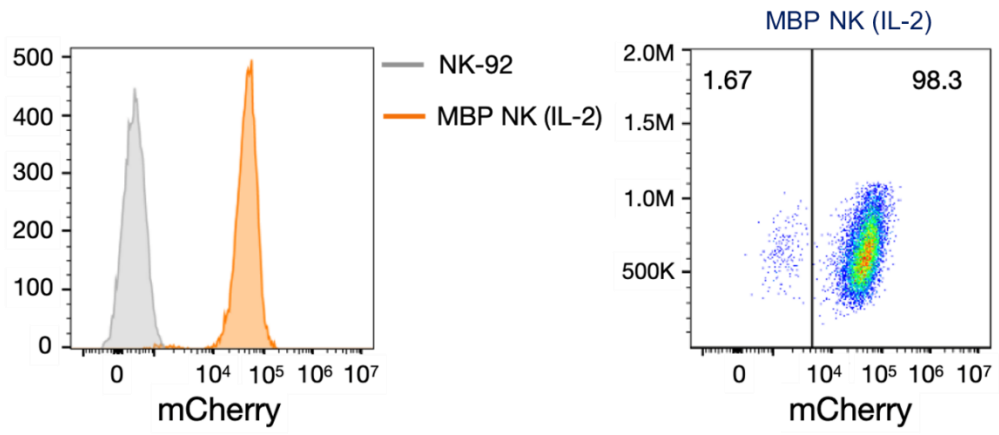

**Figure S1.** Membrane-bound IL-2 expression in the MBP NK cells

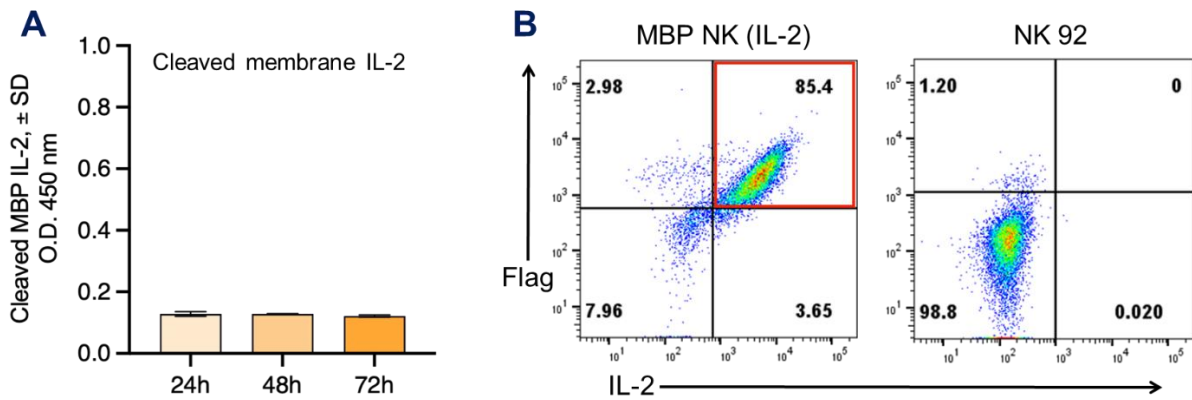

**Figure S2.** Stability of membrane bound IL-2 in MBP NK. **(A)** ELISA was introduced to investigate the cleaved form of membrane bound IL-2 in the MBP NK culture medium at specific time points (24, 48, and 72 hrs). Triplicate determinations are shown as Means  $\pm$  SDs. **(B)** The flow cytometry analysis shows that MBP IL-2 can be detected on the surface of the cells via the anti-flag as well as anti-IL-2 antibodies.

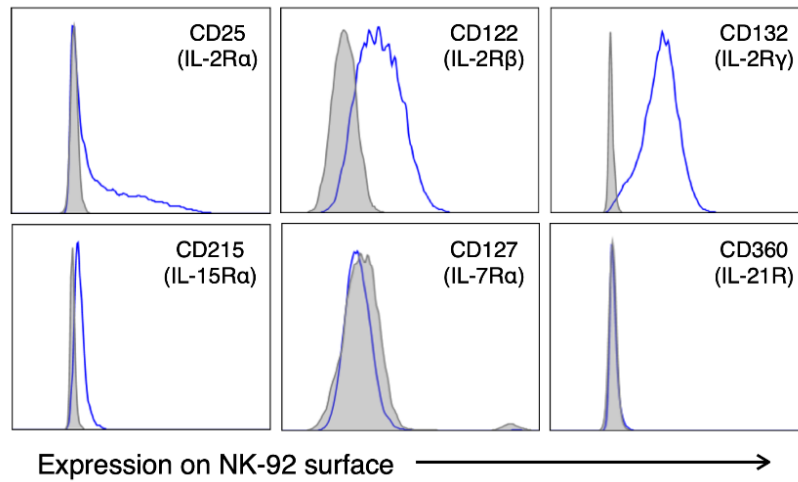

**Figure S3.** The cytokine receptors of NK-92 cells. The presence of cytokine receptors on the surface of NK-92 cells was analyzed by the flow cytometry system with following antibodies: APC-conjugated anti-CD25 antibody, PE-cyanine7-conjugated anti-CD122 antibody, PE-conjugated anti-CD132 antibody, PE-conjugated anti-CD215 antibody, PE-cyanine7-conjugated anti-CD127 antibody and APC-conjugated anti-CD360 antibody. IL-2 receptors were more abundant compared to IL-15, IL-7 or IL-21 receptor.

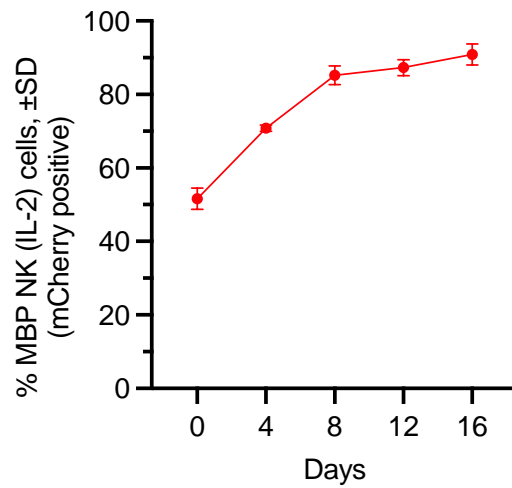

**Figure S4.** The change in the population of MBP NK (IL-2) cells during co-culture with NK-92 cells in the absence of exogenous IL-2. The ratio of NK-92 cells to MBP NK (IL-2) cells was 1 : 1 and co-cultured for 8 days without IL-2. The percentage of MBP NK (IL-2) cells was analyzed using flow cytometry by mCherry detection.

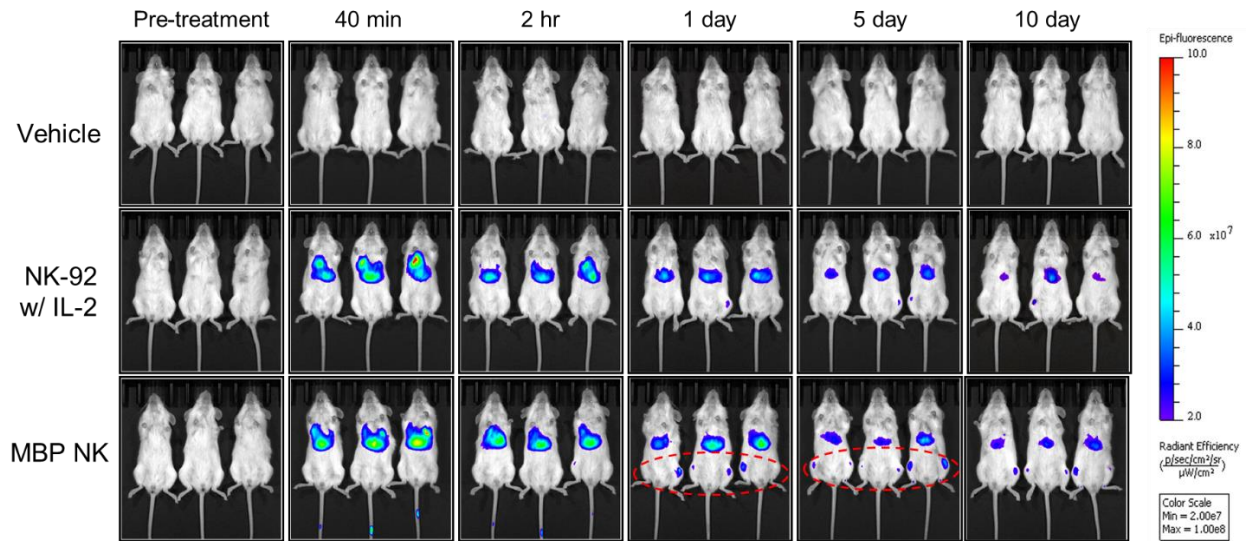

**Figure S5.** Biodistribution of MBP NK *in vivo*. The IVIS Spectrum was used for detection of DIR 750 labeled MBP NK or NK-92 following infusion via the tail vein of mice. The measurement of radiance of DIR 750 labeled NK-92 or MBP NK from each animal was detected at specific time points (0, 40 min, 2 h, D1, D5, and D10) using IVIS Spectrum.

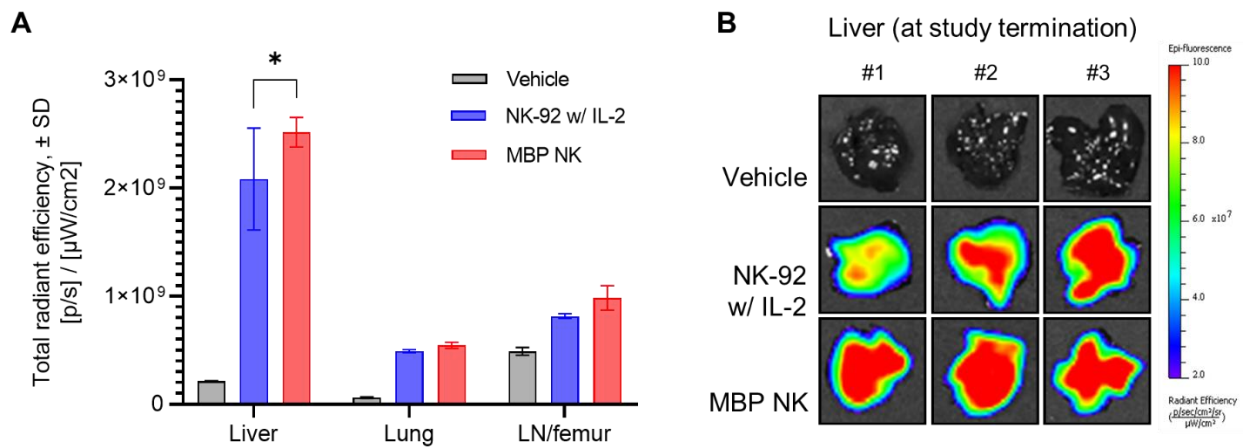

**Figure S6.** Long-term persistence of the MBP NK *in vivo*. **(A)** Liver, lungs, and LN/femur were isolated from mice and analyzed for measuring the intensity of organ-resident DIR 750 labeled MBP NK and NK-92 at the end of experiment. Data were reported as mean  $\pm$  SD and statistical significance was determined by the one-way ANOVA with Dunnett's multiple comparison test. \*,  $p = 0.0105$ . **(B)** Images of the fluorescence intensity of the liver were taken.

**Table S1.** Antibody list used for surface marker analysis

| No | Markers                  | Isotype    | Fluorescence   | Clone   | Company    |
|----|--------------------------|------------|----------------|---------|------------|
| 1  | CD56                     | Mouse IgG1 | Alexa Fluor488 | 5.1H11  | Biologend  |
| 2  | NKp30                    | Mouse IgG1 | Alexa Fluor647 | P30-15  | Biologend  |
| 3  | H7-B6                    | Mouse IgG1 | PE             | 875001  | R&D system |
| 4  | CD25 (IL-2R $\alpha$ )   | Mouse IgG1 | APC            | 3G10    | MACS       |
| 5  | CD122 (IL-2R $\beta$ )   | Mouse IgG1 | PE-cyanine7    | TU27    | Biologend  |
| 6  | CD132 (IL-2R $\gamma$ )  | Rat IgG2b  | PE             | TUGh4   | Biologend  |
| 7  | CD215 (IL-15R $\alpha$ ) | Rat IgG2b  | PE             | JM7A4   | Biologend  |
| 8  | CD127 (IL-7R $\alpha$ )  | Mouse IgG1 | PE-cyanine7    | A019D5  | Biologend  |
| 9  | CD360 (IL-21R $\alpha$ ) | Rat IgG2a  | APC            | W18100A | Biologend  |
| 10 | Isotype control          | Mouse IgG1 | Alexa Fluor488 | MOPC-21 | Biologend  |
| 11 |                          | Mouse IgG1 | PE             | MOPC-21 | Biologend  |
| 12 |                          | Mouse IgG1 | Alexa Fluor647 | MOPC-21 | Biologend  |
| 13 |                          | Mouse IgG1 | APC            | MOPC-21 | Biologend  |
| 14 |                          | Mouse IgG1 | PE-cyanine7    | MOPC-21 | Biologend  |
| 15 |                          | Rat IgG2a  | APC            | RTK2758 | Biologend  |
| 16 |                          | Rat IgG2b  | PE             | RTK4530 | Biologend  |

## Supplementary Method

### Analysis of Degranulation (CD107a)

The NK cells were co-cultured with K562 cells at a ratio 1:1 for 4 hours, added PE-conjugated anti-CD107a antibody (R&D systems) at the beginning of the co-cultures. After 1 hour of the cocultures, GolgiStop<sup>TM</sup> (BD Biosciences) was added. The percentage of CD107a<sup>+</sup> NK cells was determined by flow cytometry, and the result was analyzed using GraphPad Prism 8 software.
